# Supplementary material for: A prospective study of knee ultrasound findings in asymptomatic football players in the Uganda Premier League
Source: Research Square preprint supplement (doi:10.21203/rs.3.rs-7387462/v1), 2025-09-01
Supplement: Supplementary file 1 [file 5f9572fcb4435627911197f6.docx]

**APPENDIX I: RESEARCH INSTRUMENTS / QUESTIONNAIRE**

**Questionnaire 1:**

| **Socio demographic finding** |  |
| --- | --- |
| Age |  |
| Sex |  |
| Occupation |  |
| Footballer’s time spent at professional level. |  |
| **Clinical notes** |  |
| Asymptomatic or not (specify) |  |
|  |  |

**Questionnaire 2: Data sheet to assess the associated factors.**

| **Associated factors** | **PRESENT** | | **ABSCENT** | |
| --- | --- | --- | --- | --- |
| Weight in kgs |  | |  | |
| Smoking |  | |  | |
| Age |  | |  | |
| Nature or type of Previous injuries |  | |  | |
| Nature of playing ground:  Artificial/natural |  |  |  |  |
| Height in meters |  | |  | |

**Questionnaire 3 data sheet to assess all anatomic structures of the knee among participants who had Knee ultrasound**

| **Anatomical structure** | **Normal** | | | **abnormal** | | | **If abnormal**  **(Describe the features or patterns)** | | |
| --- | --- | --- | --- | --- | --- | --- | --- | --- | --- |
| Suprapatella tendon |  | | |  | | |  | | |
| Patella tendon |  | | |  | | |  | | |
| Supra patella bursa |  | | |  | | |  | | |
| Infra patella bursa (deep/superficial) |  |  | |  | |  |  |  | |
| Pes anserinas |  | | |  | | |  | | |
| Submembranes bursa |  | | |  | | |  | | |
| Lateral recess |  | | |  | | |  | | |
| Menisci (medial /lateral) |  | |  |  |  | |  | |  |
| Collateral ligament (medial/lateral) |  | |  |  |  | |  | |  |
| Fat pad |  | | |  | | |  | | |
| Hyaline cartilage |  | | |  | | |  | | |
| Articular surface |  | | |  | | |  | | |
